# Supplementary material for: Estimating salt content of vegetated soil at different depths with Sentinel-2 data
Source: PeerJ. 2020 Dec 21;8:e10585. doi: 10.7717/peerj.10585 (PMC7759139; doi:10.7717/peerj.10585)
Supplement: Supplemental Information 1 [file peerj-08-10585-s001.xlsx]

## Sheet: SSC, bands and indices data
Samples	SSSC_0~20cm	SSC_20~40cm	SSC_40~60cm	SSC_0~40cm	SSC_0~60cm	B1	B2	B3	B4	B5	B6	B7	B8	B8A	B9	B11	B12	SI	SI2	SI3	S1	S2	S3	S5	S6	SI-T	NDSI	BI	CRSI	Int1	Int2	NDVI	EVI	S2REP	NDVIrel	NDVIre2	NDre1	NDre2	TCIrel	MSAVI	PVI	NSDSI3	NDWI	VSDI	NDDI	SMMI	NMDI	PDI	VAPDI
1	0.0760841	0.0821363	0.0955376	0.0791102	0.084586	0.0425	0.0511	0.0969	0.113	0.1527	0.2721	0.3194	0.3228	0.3367	0.3243	0.2361	0.1779	0.0759888	0.368138	0.148858	0.452212	-0.377209	0.21428	0.0595903	0.392643	33.561	-0.497443	0.355156	0.877318	0.10495	0.2733	0.497443	0.342793	723.614	0.375971	0.10611	0.281073	0.353103	0.0388864	0.11034	0.132878	0.14058	0.175628	0.8113	0.478128	0.290784	0.370987	0.333312	0.237239
2	0.0821795	0.0798739	0.09035	0.0810267	0.0841345	0.0376	0.07	0.1096	0.1378	0.151	0.1844	0.2068	0.2008	0.2181	0.3009	0.223	0.1912	0.0982141	0.280301	0.176071	0.507983	-0.326275	0.215755	0.0880109	0.274217	63.182	-0.225625	0.257985	0.770247	0.1237	0.23275	0.225625	0.132081	727.32	0.181794	0.0837267	0.0995826	0.155953	0.00540034	0.0419245	0.0346975	0.0767745	-0.0111086	0.811	1.10357	0.220564	0.294639	0.260503	0.235242
3	0.411549	0.358232	0.489219	0.38489	0.419667	0.0556	0.1074	0.146	0.1698	0.1832	0.3001	0.3235	0.3592	0.3398	0.3594	0.2496	0.1834	0.135043	0.406955	0.223938	0.632509	-0.225108	0.230827	0.124908	0.395192	49.9706	-0.333595	0.379863	0.756714	0.1579	0.3278	0.333595	0.273646	723.997	0.299426	0.0620409	0.241879	0.27689	0.00755809	0.0654292	0.0929645	0.152887	0.153037	0.8616	0.371036	0.298131	0.354037	0.374873	0.32912
4	1.40742	1.39878	1.48092	1.4031	1.42904	0.1002	0.1306	0.1724	0.21	0.2339	0.2515	0.2647	0.2722	0.2663	0.2799	0.2904	0.2413	0.165608	0.380444	0.271702	0.621905	-0.233118	0.277213	0.159084	0.324379	78.8584	-0.118203	0.33914	0.652616	0.1912	0.32435	0.118203	0.0909943	711.861	0.0647741	0.0285825	0.0362588	0.061773	0.014277	0.0210764	0.0137577	0.0923453	-0.0432908	0.8099	2.15578	0.278611	0.27218	0.346893	0.340516
5	0.689662	0.952068	0.737359	0.820865	0.79303	0.0966	0.13	0.1794	0.2248	0.2422	0.2719	0.293	0.3222	0.3157	0.3138	0.3208	0.2593	0.17095	0.427067	0.28761	0.578292	-0.267193	0.310224	0.162899	0.395593	71.2068	-0.168178	0.387558	0.710859	0.2021	0.35995	0.168178	0.134507	724.68	0.131744	0.0745405	0.0577709	0.0949178	0.00467357	0.0294105	0.0360703	0.106016	-0.00801257	0.7759	1.10005	0.31826	0.283769	0.394568	0.381569
6	1.25612	1.26909	1.1466	1.2626	1.22394	0.0905	0.1386	0.182	0.2198	0.2126	0.2445	0.2598	0.288	0.2735	0.2956	0.2848	0.2306	0.17454	0.39527	0.28537	0.630573	-0.226562	0.288626	0.167386	0.330304	80.3656	-0.108859	0.350876	0.639401	0.2009	0.33765	0.108859	0.0864567	734.843	0.125283	0.0559846	0.0697878	0.0999153	-0.0190436	0.0191558	0.0113582	0.105161	-0.02024	0.8268	1.45679	0.279207	0.277982	0.359117	0.354244
7	0.456652	0.391519	0.365725	0.424086	0.404632	0.059	0.1062	0.1482	0.1808	0.1874	0.241	0.2575	0.2578	0.2733	0.3187	0.2542	0.1955	0.138568	0.359645	0.233777	0.587389	-0.25993	0.252303	0.129561	0.333419	66.1544	-0.2037	0.327691	0.718926	0.1645	0.30115	0.2037	0.148085	725.732	0.186455	0.0628038	0.125117	0.157563	-0.00274453	0.0381548	0.0400622	0.130531	0.0362085	0.8361	0.698147	0.263923	0.296819	0.332043	0.310446
8	0.354773	0.32725	0.429129	0.341012	0.370384	0.0877	0.1296	0.1762	0.2126	0.2168	0.2463	0.2585	0.2706	0.2747	0.3044	0.2837	0.2266	0.165991	0.389494	0.276125	0.609595	-0.242548	0.289044	0.156373	0.331448	77.3935	-0.127437	0.34736	0.661667	0.1944	0.33175	0.127437	0.0983653	727.246	0.117803	0.0545106	0.0637011	0.0877341	-0.00641669	0.0227014	0.0174901	0.111895	-0.0161175	0.82	1.28957	0.279236	0.277197	0.355057	0.347246
9	0.917484	1.1639	1.15669	1.04069	1.07936	0.0974	0.168	0.214	0.2622	0.2914	0.3014	0.3065	0.3096	0.3135	0.3035	0.3376	0.2963	0.20988	0.461332	0.338445	0.640732	-0.218968	0.333993	0.205839	0.384111	83.6364	-0.0891089	0.408694	0.625641	0.2381	0.39485	0.0891089	0.0788406	680.325	0.036535	0.019678	0.0168691	0.0252551	0.0166604	0.0144151	0.00693373	0.0651522	-0.0370143	0.7775	2.42104	0.325773	0.287313	0.418718	0.416833
10	1.66104	0.704072	0.467172	1.18256	0.944094	0.0878	0.11	0.1616	0.2022	0.2518	0.2879	0.3041	0.3116	0.3208	0.3223	0.3161	0.2514	0.149138	0.412204	0.258842	0.544016	-0.295324	0.29705	0.137636	0.401397	63.0299	-0.226769	0.379206	0.754855	0.1819	0.3423	0.226769	0.173493	706.309	0.120503	0.0540496	0.066889	0.0940817	0.0402798	0.041509	0.0562153	0.114009	0.00737949	0.7664	0.936967	0.318459	0.288304	0.382833	0.35945
11	0.111677	0.105913	0.107498	0.108795	0.108362	0.0487	0.0676	0.1222	0.1222	0.1813	0.3018	0.3257	0.3498	0.3351	0.3419	0.2449	0.194	0.0908885	0.377038	0.172817	0.553191	-0.287671	0.2209	0.0676	0.3351	36.4667	-0.465559	0.356686	0.815025	0.1222	0.28975	0.465559	0.340902	717.388	0.297831	0.0522845	0.249431	0.284813	0.07092	0.101055	0.124998	0.115972	0.155517	0.819	0.499201	0.293486	0.367183	0.33845	0.253035
12	0.0930879	0.0913587	0.119026	0.0922233	0.101158	0.0413	0.0651	0.1142	0.1148	0.1761	0.31	0.3361	0.3326	0.3462	0.3558	0.2439	0.1854	0.0864493	0.382198	0.161928	0.567073	-0.276265	0.201385	0.065442	0.348019	33.16	-0.501952	0.364738	0.827548	0.1145	0.2876	0.501952	0.37401	717.9	0.325675	0.0551661	0.275458	0.312378	0.0731653	0.111556	0.137943	0.136268	0.17336	0.83	0.486577	0.299451	0.370986	0.341758	0.244561
13	0.115279	0.0976991	0.0978432	0.106489	0.103607	0.0411	0.0755	0.1262	0.1394	0.1912	0.306	0.3266	0.3242	0.3361	0.3325	0.2545	0.2029	0.10259	0.385126	0.188039	0.541607	-0.297348	0.23301	0.083397	0.371255	41.4758	-0.41367	0.363862	0.813638	0.1328	0.30085	0.41367	0.306148	717.744	0.274796	0.0468774	0.230893	0.261491	0.0548112	0.0865318	0.112953	0.112812	0.138165	0.8087	0.499253	0.298105	0.358538	0.351082	0.282165
14	0.077136	0.104328	0.148422	0.0907319	0.109962	0.0392	0.0644	0.1162	0.1144	0.1527	0.3454	0.386	0.3658	0.3922	0.3948	0.2259	0.1517	0.0858333	0.424748	0.163064	0.562937	-0.279642	0.206417	0.0634024	0.386125	29.1688	-0.548362	0.408544	0.845051	0.1153	0.3114	0.548362	0.435259	722.709	0.43953	0.063449	0.38687	0.43308	0.0469194	0.124073	0.169206	0.196504	0.26905	0.8627	0.341702	0.32004	0.413094	0.376362	0.266435
15	0.128969	0.122484	0.11672	0.125727	0.122724	0.0358	0.0346	0.0835	0.0597	0.1517	0.3744	0.4224	0.4528	0.431	0.3995	0.2156	0.1431	0.0454491	0.443055	0.102647	0.579564	-0.266172	0.144074	0.024738	0.308152	13.8515	-0.756674	0.435115	0.893367	0.0716	0.2871	0.756674	0.606818	719.042	0.47932	0.0702756	0.423304	0.471521	0.138748	0.207335	0.235775	0.202119	0.333127	0.8664	0.388646	0.340767	0.45397	0.368021	0.139872
16	0.0899177	0.0848742	0.0971227	0.087396	0.0906382	0.0409	0.0387	0.0689	0.0685	0.1446	0.2808	0.3201	0.3526	0.3512	0.3446	0.2437	0.1635	0.0514874	0.364391	0.0971569	0.564964	-0.277985	0.121955	0.0384753	0.349161	19.5046	-0.673576	0.357818	0.894675	0.0687	0.2443	0.673576	0.480145	717.772	0.4167	0.111392	0.320169	0.377663	0.0917117	0.169575	0.175546	0.196955	0.180703	0.8454	0.576947	0.302267	0.357331	0.313587	0.146755
17	0.116144	0.103463	0.101878	0.109803	0.107162	0.0398	0.0707	0.1286	0.127	0.1862	0.338	0.3641	0.367	0.3694	0.3911	0.2505	0.1912	0.0947571	0.411246	0.18074	0.556693	-0.284775	0.231007	0.0698204	0.364804	34.3801	-0.488316	0.390622	0.821778	0.1278	0.3125	0.488316	0.378478	718.684	0.329734	0.0443879	0.289584	0.323278	0.072026	0.106369	0.14454	0.134254	0.191805	0.8232	0.435968	0.3156	0.38232	0.367772	0.27811
18	0.0995724	0.0945289	0.117873	0.0970507	0.103991	0.0433	0.0667	0.1206	0.1194	0.1873	0.3167	0.3351	0.362	0.3438	0.3168	0.2583	0.2043	0.0892411	0.383405	0.169708	0.558626	-0.283181	0.215887	0.0660363	0.340379	34.7295	-0.484456	0.363943	0.819939	0.12	0.2919	0.484456	0.359627	715.806	0.294671	0.0410295	0.256746	0.282925	0.0822944	0.106371	0.132926	0.116732	0.142003	0.8097	0.546649	0.30407	0.359375	0.343114	0.251904
19	0.0871798	0.104616	0.146693	0.0958979	0.11283	0.044	0.0807	0.1252	0.1466	0.2	0.2997	0.3283	0.3348	0.3427	0.3444	0.2781	0.2199	0.108769	0.393205	0.192786	0.550477	-0.289925	0.227439	0.0944938	0.401277	42.7779	-0.400777	0.37274	0.815554	0.1359	0.30725	0.400777	0.303176	718.147	0.262945	0.0669365	0.19952	0.242854	0.0522668	0.0827354	0.112072	0.116867	0.104059	0.7949	0.58775	0.312076	0.338408	0.361057	0.296798
20	0.097555	0.0819922	0.0969786	0.0897736	0.0921753	0.0365	0.0695	0.1204	0.1318	0.1683	0.2788	0.3154	0.3382	0.3331	0.3515	0.2376	0.1843	0.0957084	0.377919	0.178514	0.527314	-0.309488	0.228327	0.0760806	0.364639	39.5677	-0.432996	0.358227	0.824516	0.1261	0.29265	0.432996	0.314011	722.516	0.32868	0.08874	0.247148	0.304114	0.0381567	0.0919337	0.116553	0.126333	0.167338	0.8229	0.442516	0.289318	0.370596	0.343561	0.268423
21	0.0799748	0.0976991	0.131995	0.0888369	0.103223	0.0289	0.0428	0.073	0.0932	0.1167	0.187	0.2105	0.2322	0.2304	0.3225	0.2237	0.1798	0.0631582	0.259036	0.118386	0.459227	-0.370588	0.158963	0.0546433	0.294155	40.4514	-0.42398	0.248537	0.86369	0.0831	0.1983	0.42398	0.233556	722.5	0.327571	0.103977	0.231478	0.286675	0.0185345	0.0841969	0.0759576	0.108798	0.0147545	0.8126	0.932741	0.227075	0.29421	0.239041	0.171594
22	0.179692	0.178539	0.198857	0.179116	0.185696	0.018	0.0298	0.0692	0.0559	0.1151	0.3489	0.4141	0.3834	0.4306	0.4024	0.1964	0.1098	0.0408145	0.439693	0.0889576	0.533095	-0.304551	0.129808	0.0240725	0.34784	12.9819	-0.770195	0.434213	0.917702	0.06255	0.27785	0.770195	0.607293	722.949	0.578156	0.104811	0.503879	0.565004	0.0837069	0.214409	0.238316	0.282822	0.373525	0.8939	0.346825	0.334656	0.466884	0.365095	0.12645
23	0.114559	0.152601	0.187618	0.13358	0.151593	0.0225	0.0573	0.1072	0.1044	0.1426	0.3405	0.3981	0.3762	0.3971	0.3299	0.2156	0.1354	0.0773442	0.424358	0.149637	0.548851	-0.29128	0.195317	0.0558034	0.386728	26.2906	-0.583649	0.410594	0.861341	0.1058	0.30435	0.583649	0.459137	724.216	0.471558	0.0767354	0.409646	0.472536	0.0473886	0.136011	0.1799	0.22849	0.29623	0.8748	0.326658	0.319509	0.423606	0.373174	0.247941
24	0.0821363	0.094673	0.11355	0.0884047	0.0967865	0.0405	0.0318	0.0714	0.0644	0.1534	0.2868	0.327	0.378	0.3494	0.2986	0.2231	0.1656	0.045254	0.362389	0.0961526	0.493789	-0.338877	0.144596	0.0286824	0.315145	18.4316	-0.688739	0.355285	0.903707	0.0679	0.2426	0.688739	0.475857	716.098	0.389817	0.0983967	0.303044	0.361366	0.114605	0.175195	0.177366	0.147929	0.220611	0.8336	0.514793	0.293133	0.395475	0.309392	0.136067
25	0.134012	0.161103	0.177675	0.147558	0.157597	0.0276	0.0315	0.0596	0.071	0.1354	0.2422	0.2947	0.3144	0.3238	0.3694	0.2476	0.1657	0.0472916	0.336808	0.0926993	0.443662	-0.385366	0.134337	0.0375252	0.385735	21.9271	-0.640324	0.331493	0.921415	0.0653	0.2272	0.640324	0.417561	720.55	0.410279	0.14417	0.282839	0.370379	0.0673456	0.155011	0.155251	0.198161	0.133357	0.8263	0.655267	0.288229	0.328178	0.294537	0.147143
26	0.260676	0.270763	0.256785	0.26572	0.262742	0.0143	0.0205	0.0529	0.0409	0.0851	0.2539	0.3353	0.3628	0.3564	0.3779	0.1843	0.098	0.028956	0.362619	0.0668672	0.501222	-0.332248	0.105542	0.0158497	0.275553	11.4759	-0.79411	0.358739	0.928176	0.0469	0.2251	0.79411	0.544698	726.357	0.614496	0.16795	0.497935	0.595147	0.0646042	0.220867	0.199455	0.305703	0.318291	0.9021	0.427741	0.283714	0.42289	0.298477	0.0709157
27	0.0837214	0.084586	0.09035	0.0841537	0.0862191	0.0386	0.0215	0.0514	0.0513	0.1156	0.2216	0.2706	0.3186	0.2985	0.3222	0.225	0.1601	0.0332107	0.307207	0.0726199	0.419103	-0.409341	0.122643	0.0214582	0.297919	17.1859	-0.70669	0.302876	0.930258	0.05135	0.2006	0.70669	0.427667	719.974	0.441681	0.147856	0.314353	0.401346	0.0772652	0.172879	0.152786	0.168528	0.140401	0.8316	0.66851	0.264317	0.34172	0.261754	0.0977318
28	0.113262	0.123061	0.128104	0.118161	0.121476	0.0283	0.0305	0.074	0.0518	0.1332	0.2806	0.3237	0.393	0.3303	0.3568	0.2221	0.1432	0.039748	0.342429	0.0903285	0.588803	-0.258809	0.125679	0.02135	0.23121	15.6827	-0.728867	0.334337	0.875738	0.0629	0.22805	0.728867	0.492973	717.953	0.425243	0.0813554	0.356211	0.41694	0.124439	0.187935	0.173824	0.215987	0.195873	0.866	0.576372	0.281448	0.361415	0.286211	0.101056
29	0.0971227	0.0915028	0.0949612	0.0943128	0.0945289	0.0382	0.0311	0.061	0.0634	0.1088	0.2549	0.3349	0.3506	0.3502	0.3417	0.2019	0.1311	0.0444043	0.361083	0.0879805	0.490536	-0.341799	0.124354	0.0323236	0.363978	18.1039	-0.693424	0.355893	0.917912	0.0622	0.2373	0.693424	0.478846	726.644	0.525926	0.157495	0.401705	0.509579	0.052644	0.177084	0.178644	0.212613	0.268611	0.8677	0.441578	0.285835	0.408958	0.309308	0.133649
30	0.197705	0.135453	0.167299	0.166579	0.166819	0.039	0.0289	0.0615	0.0641	0.0922	0.2424	0.323	0.358	0.3488	0.3279	0.2022	0.1297	0.0430406	0.359934	0.0888316	0.450858	-0.378495	0.136407	0.0301218	0.363546	18.3773	-0.689513	0.354641	0.923428	0.0628	0.2372	0.689513	0.469291	728.617	0.581859	0.179973	0.448894	0.555877	0.0321626	0.175434	0.177184	0.218439	0.266062	0.864	0.443138	0.285084	0.405906	0.30873	0.135195
31	0.170614	0.153033	0.187906	0.161824	0.170518	0.0216	0.0316	0.0657	0.0555	0.0969	0.2434	0.3098	0.3474	0.341	0.4268	0.1871	0.1031	0.0418784	0.351678	0.0860043	0.569369	-0.274397	0.115391	0.0266941	0.288059	16.2757	-0.72005	0.345487	0.895706	0.0606	0.2311	0.72005	0.496695	725.486	0.557433	0.167009	0.430502	0.523482	0.0576565	0.186337	0.178292	0.289456	0.291422	0.9046	0.423767	0.275034	0.407161	0.296879	0.11176
32	0.119314	0.119746	0.102887	0.11953	0.113982	0.0173	0.0179	0.0462	0.0332	0.071	0.2869	0.3792	0.3816	0.4127	0.4313	0.1755	0.0818	0.0243779	0.416603	0.0568918	0.539157	-0.299413	0.0856894	0.0128632	0.296572	8.04458	-0.851088	0.414033	0.94136	0.0397	0.24605	0.851088	0.642067	726.918	0.70643	0.179817	0.603241	0.684585	0.0582764	0.261131	0.243051	0.364166	0.403264	0.9208	0.357016	0.317113	0.476119	0.335852	0.0391568
33	0.107642	0.0968345	0.10159	0.102238	0.102022	0.0166	0.0258	0.0575	0.0432	0.0921	0.3302	0.4184	0.409	0.4574	0.5171	0.195	0.0887	0.033385	0.46302	0.07192	0.597222	-0.252174	0.0962791	0.0193837	0.343647	9.44469	-0.827407	0.459436	0.927541	0.05035	0.27905	0.827407	0.679863	725.388	0.664786	0.161503	0.563817	0.639177	0.0728395	0.24619	0.265749	0.374692	0.402207	0.9197	0.345799	0.351596	0.473755	0.376649	0.0785494
34	0.178683	0.171622	0.199001	0.175153	0.183102	0.0177	0.0241	0.0492	0.0396	0.0877	0.2703	0.35	0.3618	0.3768	0.4275	0.1869	0.0965	0.0308927	0.382056	0.0631569	0.608586	-0.243328	0.0808432	0.0193976	0.303278	10.5096	-0.809798	0.378875	0.923455	0.0444	0.2328	0.809798	0.58801	725.528	0.62239	0.16458	0.510056	0.599269	0.0676296	0.23239	0.21415	0.318984	0.336881	0.9121	0.412423	0.297414	0.433808	0.313048	0.0661651
35	0.0694843	0.0699166	0.0851624	0.0697005	0.0748544	0.0404	0.0514	0.0942	0.0906	0.1592	0.3501	0.4048	0.4392	0.4127	0.3965	0.2393	0.1684	0.068241	0.432901	0.130698	0.567329	-0.276056	0.166041	0.0494357	0.396928	21.953	-0.639976	0.422528	0.877897	0.0924	0.29875	0.639976	0.512637	721.226	0.443259	0.0820661	0.374828	0.435461	0.0851582	0.156064	0.200606	0.173902	0.265951	0.8438	0.412865	0.337332	0.416626	0.375476	0.22352
36	0.144243	0.152313	0.163553	0.148278	0.15337	0.015	0.0312	0.0714	0.05	0.0998	0.302	0.3851	0.464	0.4052	0.3874	0.1917	0.1029	0.0394968	0.41447	0.0871663	0.624	-0.231527	0.114423	0.0218487	0.283754	12.3396	-0.780316	0.408273	0.895475	0.0607	0.2633	0.780316	0.603589	725.382	0.604752	0.145928	0.503235	0.588369	0.0794308	0.219868	0.225579	0.301426	0.357681	0.9095	0.371385	0.316967	0.452129	0.341762	0.102032
37	0.206783	0.192229	0.192085	0.199506	0.197032	0.0212	0.0372	0.0818	0.0684	0.1292	0.317	0.3943	0.456	0.4138	0.3767	0.2186	0.1339	0.0504428	0.427317	0.106629	0.54386	-0.295455	0.150406	0.0311061	0.346014	16.5297	-0.7163	0.419415	0.897693	0.0751	0.282	0.7163	0.558827	724.038	0.524125	0.132458	0.420887	0.506399	0.0845048	0.188623	0.217762	0.240284	0.308665	0.8721	0.397706	0.33092	0.429466	0.360985	0.162823
38	0.134589	0.167299	0.20246	0.150944	0.168116	0.0163	0.0297	0.0672	0.0436	0.0975	0.3109	0.3877	0.4464	0.4208	0.4183	0.1892	0.1026	0.035985	0.428357	0.0801049	0.681193	-0.189632	0.0986505	0.0192696	0.273019	10.3612	-0.812231	0.423053	0.896537	0.0554	0.2658	0.812231	0.646045	724.378	0.62377	0.150198	0.522527	0.598104	0.0892974	0.237867	0.240813	0.296779	0.379672	0.9132	0.362914	0.326243	0.468987	0.349173	0.0798019
39	0.136462	0.138624	0.172487	0.137543	0.149191	0.0299	0.0371	0.0844	0.0636	0.1321	0.387	0.4586	0.4584	0.4669	0.4039	0.2111	0.1179	0.0485753	0.478711	0.10568	0.583333	-0.263158	0.144686	0.0279569	0.351835	13.6218	-0.760226	0.471212	0.899568	0.074	0.30745	0.760226	0.642095	722.713	0.558932	0.0935707	0.491042	0.552734	0.102205	0.205416	0.257059	0.283283	0.377286	0.8927	0.336647	0.362325	0.469531	0.397935	0.166184
40	0.114415	0.0982755	0.0951053	0.106345	0.102598	0.0418	0.0318	0.076	0.0577	0.1474	0.2787	0.3114	0.3956	0.321	0.3486	0.2228	0.1643	0.0428353	0.334883	0.0954216	0.551127	-0.289385	0.137899	0.0241429	0.243707	17.9751	-0.695273	0.326145	0.877013	0.06685	0.22735	0.695273	0.460734	714.903	0.370623	0.0705353	0.308144	0.357454	0.129554	0.17372	0.163201	0.151124	0.180581	0.8416	0.587646	0.276298	0.37071	0.283232	0.115188
41	0.31846	0.312264	0.310102	0.315362	0.313609	0.0403	0.0447	0.0875	0.0772	0.1497	0.3511	0.3956	0.426	0.4089	0.4055	0.2222	0.1384	0.0587439	0.425224	0.116688	0.579016	-0.266612	0.151119	0.0394382	0.360767	18.8799	-0.68237	0.416124	0.882901	0.08235	0.2868	0.68237	0.539578	720.067	0.464017	0.0760526	0.402157	0.450944	0.0961545	0.17384	0.207957	0.23239	0.295833	0.8738	0.39515	0.329068	0.422482	0.363345	0.186452
42	0.431435	0.523659	0.59398	0.477547	0.516358	0.0444	0.0622	0.1114	0.112	0.1717	0.3268	0.3706	0.383	0.3823	0.3834	0.2545	0.1694	0.083465	0.413651	0.157968	0.555357	-0.285878	0.200592	0.062535	0.384359	29.2964	-0.546834	0.398368	0.849368	0.1117	0.30285	0.546834	0.425589	720.706	0.380144	0.0782682	0.311133	0.366771	0.0712457	0.124298	0.164316	0.200755	0.200691	0.843	0.463052	0.324749	0.368643	0.367198	0.256239
43	0.339067	0.328403	0.339643	0.333735	0.335704	0.0533	0.0716	0.1166	0.1248	0.1716	0.3289	0.3686	0.3688	0.382	0.373	0.2598	0.1801	0.0945287	0.418443	0.170794	0.573718	-0.270876	0.203236	0.0766353	0.408864	32.6702	-0.507498	0.401869	0.837828	0.1207	0.3117	0.507498	0.403438	721.71	0.380058	0.074694	0.314286	0.36468	0.051577	0.111454	0.154649	0.181178	0.190402	0.8383	0.454357	0.326665	0.367806	0.375807	0.280995
44	0.134445	0.0854506	0.0822804	0.109948	0.100725	0.057	0.0549	0.1005	0.1012	0.1619	0.3181	0.3584	0.3692	0.3736	0.3691	0.2329	0.1565	0.0745378	0.399898	0.142624	0.54249	-0.296605	0.185257	0.0552824	0.376202	27.0878	-0.573715	0.387064	0.86331	0.10085	0.28765	0.573715	0.434021	720.214	0.395331	0.0802371	0.325417	0.377667	0.0723519	0.133892	0.166445	0.196199	0.231987	0.8521	0.424137	0.311303	0.389515	0.353146	0.229614
45	0.477691	0.522362	0.553055	0.500026	0.517703	0.0495	0.0565	0.0996	0.1013	0.1677	0.311	0.349	0.3702	0.3622	0.3578	0.239	0.1631	0.0756535	0.389064	0.142063	0.557749	-0.283904	0.178575	0.0574644	0.368382	27.968	-0.562891	0.376099	0.856764	0.10045	0.28155	0.562891	0.421827	719.032	0.36705	0.0760547	0.299352	0.350881	0.078439	0.130568	0.158697	0.188759	0.204923	0.8486	0.466216	0.306847	0.374591	0.344571	0.224917
46	0.193958	0.167876	0.129545	0.180917	0.163793	0.0453	0.0662	0.109	0.1136	0.1815	0.3214	0.3574	0.3758	0.3702	0.3764	0.2496	0.1727	0.0867198	0.402286	0.157436	0.582746	-0.263626	0.187045	0.0689938	0.385823	30.6861	-0.530384	0.387238	0.840889	0.1113	0.2964	0.530384	0.412461	718.51	0.342034	0.070561	0.278187	0.326406	0.0782784	0.119588	0.154987	0.182098	0.194579	0.8461	0.463203	0.315712	0.370095	0.359128	0.253339
47	0.282724	0.283156	0.231136	0.28294	0.265672	0.0397	0.0398	0.0877	0.0612	0.1353	0.3681	0.4089	0.4608	0.4188	0.3659	0.2072	0.1151	0.0493534	0.432239	0.106943	0.650327	-0.211881	0.134855	0.0277738	0.292253	14.6132	-0.745	0.423248	0.87194	0.07445	0.28385	0.745	0.601008	719.997	0.51164	0.06443	0.462455	0.502756	0.116223	0.202043	0.226453	0.285759	0.338019	0.9033	0.375784	0.330398	0.440831	0.359806	0.141741
48	0.121764	0.124646	0.12796	0.123205	0.12479	0.0347	0.0601	0.1088	0.1058	0.1552	0.3316	0.3728	0.3664	0.3881	0.4037	0.2295	0.1457	0.0797407	0.416717	0.15176	0.568053	-0.275467	0.191531	0.0584428	0.377399	27.261	-0.571573	0.402263	0.85162	0.1073	0.30135	0.571573	0.448908	721.687	0.428677	0.0785049	0.362366	0.412121	0.0611302	0.132385	0.172805	0.223348	0.256801	0.8687	0.379989	0.31882	0.398664	0.367316	0.246316
49	0.404632	0.361402	0.324801	0.383017	0.363612	0.0304	0.045	0.092	0.0802	0.1448	0.3451	0.3941	0.409	0.4056	0.4216	0.2136	0.1262	0.060075	0.423565	0.122049	0.561097	-0.28115	0.163964	0.0392283	0.353577	19.7732	-0.669823	0.413453	0.879885	0.0861	0.2889	0.669823	0.525076	721.137	0.473837	0.0805914	0.408859	0.462609	0.0871432	0.168725	0.203517	0.25721	0.310078	0.8836	0.367124	0.324142	0.426885	0.362913	0.193298
50	0.783471	0.521065	0.315722	0.652268	0.540086	0.0546	0.0485	0.0923	0.0843	0.1815	0.3357	0.3783	0.4	0.3854	0.3853	0.2532	0.1774	0.0639418	0.405165	0.125003	0.575326	-0.269578	0.160431	0.0442963	0.351996	21.8734	-0.641047	0.394512	0.870517	0.0883	0.281	0.641047	0.492815	716.304	0.359675	0.0689225	0.298144	0.351554	0.124648	0.157998	0.186886	0.176033	0.207015	0.8353	0.511792	0.32607	0.379412	0.350427	0.195888
51	0.423653	0.321631	0.349442	0.372642	0.364909	0.048	0.0672	0.1136	0.119	0.1853	0.3096	0.3549	0.4062	0.3715	0.3767	0.2508	0.1841	0.0894248	0.406298	0.164517	0.564706	-0.278195	0.201167	0.0703944	0.389159	32.0323	-0.514781	0.390094	0.839938	0.1163	0.30205	0.514781	0.399146	719.543	0.334411	0.0908824	0.251162	0.313958	0.0759324	0.114508	0.151869	0.153369	0.193958	0.8313	0.452667	0.316949	0.377976	0.363842	0.264402
52	0.254336	0.257362	0.219175	0.255849	0.243624	0.0377	0.0354	0.0766	0.0544	0.1268	0.3348	0.4167	0.4444	0.4217	0.3814	0.2	0.1072	0.0438835	0.432039	0.0939517	0.650735	-0.211581	0.117713	0.0251405	0.299484	12.9002	-0.771477	0.425194	0.888022	0.0655	0.27635	0.771477	0.619351	723.299	0.537648	0.114871	0.450607	0.533395	0.11108	0.215385	0.233433	0.302083	0.356603	0.9092	0.36777	0.330023	0.451228	0.357311	0.119449
53	0.225084	0.241799	0.205198	0.233441	0.224027	0.0501	0.0736	0.119	0.1264	0.176	0.3019	0.3339	0.3296	0.348	0.3465	0.2357	0.1696	0.0964523	0.388898	0.173603	0.582278	-0.264	0.20437	0.0781768	0.36964	36.3218	-0.467116	0.370244	0.817252	0.1227	0.2967	0.467116	0.356408	720.054	0.328244	0.070934	0.263444	0.309669	0.055302	0.101134	0.130577	0.163089	0.192393	0.8512	0.416556	0.297202	0.37422	0.351131	0.266234
54	0.326242	0.344687	0.405209	0.335464	0.358712	0.0318	0.073	0.1164	0.123	0.1604	0.3274	0.3676	0.3574	0.3828	0.3991	0.2296	0.1467	0.0947576	0.418585	0.169346	0.593496	-0.255102	0.196126	0.0771392	0.404505	32.1317	-0.513642	0.402076	0.833213	0.1197	0.3111	0.513642	0.412827	722.793	0.409426	0.0780062	0.342353	0.392424	0.0414946	0.113357	0.156519	0.220303	0.250163	0.8763	0.344955	0.315636	0.395073	0.375171	0.278058
55	0.128536	0.125366	0.127384	0.126951	0.127096	0.0315	0.0498	0.1004	0.0816	0.1667	0.3381	0.3704	0.4244	0.3857	0.4101	0.2346	0.1536	0.063747	0.406821	0.129378	0.610294	-0.242009	0.164511	0.0404749	0.313477	21.1563	-0.65076	0.394237	0.851956	0.091	0.28385	0.65076	0.506226	717.109	0.396452	0.065764	0.33954	0.379259	0.119866	0.161761	0.189085	0.208655	0.243592	0.8644	0.455266	0.319219	0.39372	0.348791	0.189307
56	0.162544	0.17926	0.171767	0.170902	0.17119	0.0317	0.045	0.0956	0.072	0.1499	0.3599	0.3932	0.4112	0.4064	0.4096	0.2174	0.1251	0.056921	0.423656	0.11968	0.625	-0.230769	0.15296	0.0338912	0.306075	17.7165	-0.698997	0.412729	0.862348	0.0838	0.287	0.698997	0.556999	718.783	0.461082	0.0606812	0.411926	0.447984	0.116238	0.181154	0.210119	0.269489	0.302982	0.8929	0.395233	0.325902	0.419415	0.357859	0.170936
57	0.205054	0.226525	0.242231	0.215789	0.224603	0.033	0.0366	0.0798	0.0551	0.1306	0.3331	0.3799	0.4472	0.3953	0.3737	0.1976	0.1101	0.0449072	0.407021	0.0969745	0.664247	-0.201745	0.120136	0.0252714	0.272945	13.9388	-0.755329	0.399122	0.873799	0.06745	0.2651	0.755329	0.585986	720.02	0.503328	0.0853926	0.436705	0.488345	0.118001	0.207017	0.215143	0.284368	0.333446	0.908	0.387484	0.312496	0.437838	0.337776	0.117496
58	0.396851	0.342237	0.294828	0.369544	0.344638	0.034	0.0722	0.1186	0.1276	0.1591	0.3317	0.3792	0.3848	0.3933	0.3957	0.2226	0.1426	0.0959829	0.430154	0.174206	0.565831	-0.277277	0.209603	0.0776789	0.423146	32.4434	-0.510079	0.413481	0.841716	0.1231	0.31975	0.510079	0.41069	724.122	0.423968	0.0849655	0.351671	0.40888	0.0335255	0.111281	0.160186	0.219058	0.277155	0.8742	0.295876	0.319559	0.413052	0.386308	0.292889
59	0.164273	0.193958	0.213123	0.179116	0.190451	0.0236	0.0321	0.0754	0.0489	0.1282	0.385	0.4534	0.4908	0.4766	0.4379	0.2027	0.1037	0.0396193	0.484999	0.0898686	0.656442	-0.207407	0.114862	0.0208182	0.309095	10.2602	-0.813892	0.479102	0.90102	0.06215	0.30045	0.813892	0.699199	721.757	0.576058	0.106314	0.50039	0.559147	0.127722	0.235296	0.274459	0.323107	0.403209	0.9116	0.337427	0.36622	0.482248	0.395142	0.106649
60	0.453194	0.491092	0.476106	0.472143	0.473464	0.0513	0.0561	0.1058	0.1017	0.1785	0.3216	0.3541	0.3746	0.3645	0.3674	0.2484	0.1735	0.0755339	0.392934	0.146753	0.551622	-0.288973	0.191798	0.053926	0.350375	27.9012	-0.563707	0.378422	0.850863	0.10375	0.286	0.563707	0.422794	717.082	0.342541	0.0625273	0.286143	0.329703	0.0953877	0.130786	0.159949	0.17753	0.189427	0.837	0.496962	0.3119	0.36826	0.346591	0.226716
61	0.484752	0.401318	0.35852	0.443035	0.414863	0.049	0.0854	0.1438	0.1626	0.1789	0.3183	0.3477	0.3538	0.366	0.3738	0.254	0.1839	0.117839	0.425527	0.217065	0.525215	-0.31129	0.273793	0.096565	0.41385	44.4262	-0.38479	0.400493	0.811102	0.1532	0.3362	0.38479	0.298924	724.145	0.343366	0.0697063	0.28037	0.320547	0.0125403	0.0768048	0.115927	0.160082	0.180645	0.8243	0.36104	0.315017	0.368081	0.389769	0.334192
62	0.27206	0.266872	0.238485	0.269466	0.259139	0.0489	0.1028	0.1538	0.1842	0.1984	0.3052	0.3381	0.347	0.3486	0.3659	0.2692	0.1995	0.137607	0.423209	0.239967	0.558089	-0.283624	0.275583	0.123119	0.417504	52.8399	-0.308559	0.394274	0.777719	0.169	0.3433	0.308559	0.244236	725.564	0.274589	0.0663812	0.212073	0.260391	0.00619497	0.0586427	0.0882406	0.148709	0.128521	0.8219	0.411912	0.311441	0.341246	0.391487	0.353453
63	0.277248	0.213844	0.135453	0.245546	0.208848	0.0533	0.122	0.1662	0.199	0.238	0.2899	0.3196	0.3312	0.3275	0.3531	0.2744	0.2205	0.155814	0.417708	0.259275	0.613065	-0.239875	0.271097	0.146077	0.392133	60.7634	-0.244065	0.38322	0.724855	0.1826	0.34635	0.244065	0.199969	719.364	0.158267	0.0609006	0.0983141	0.146341	0.0323545	0.0449692	0.063092	0.108911	0.0882206	0.8245	0.469007	0.302119	0.332685	0.385705	0.359463
64	0.459967	0.34339	0.360682	0.401678	0.388013	0.0537	0.0639	0.1114	0.114	0.1802	0.3002	0.3336	0.3586	0.3543	0.3417	0.2478	0.1809	0.0853499	0.388503	0.159392	0.560526	-0.281619	0.198742	0.0653914	0.362569	32.1761	-0.513133	0.372189	0.836857	0.1127	0.28985	0.513133	0.385331	717.717	0.325725	0.0826585	0.249792	0.29856	0.0776567	0.114772	0.143988	0.156053	0.176881	0.8329	0.487312	0.305723	0.36705	0.347348	0.246645
65	0.218887	0.236179	0.279265	0.227533	0.244777	0.0571	0.0546	0.091	0.0803	0.146	0.285	0.3231	0.334	0.3445	0.3362	0.2112	0.1423	0.0662147	0.365252	0.121363	0.67995	-0.190511	0.133833	0.04818	0.303993	23.3091	-0.62194	0.353735	0.833952	0.08565	0.2579	0.62194	0.466191	719.025	0.404689	0.0945195	0.322506	0.377531	0.0876418	0.150439	0.16231	0.194908	0.239878	0.8866	0.443321	0.285732	0.394842	0.316653	0.173173
66	0.309814	0.285317	0.250301	0.297566	0.281811	0.0364	0.0585	0.1052	0.1044	0.1617	0.341	0.3813	0.3908	0.3974	0.4025	0.2337	0.1474	0.0781499	0.424138	0.148211	0.560345	-0.281768	0.187742	0.0580551	0.394378	26.2708	-0.583898	0.410885	0.861192	0.1048	0.3035	0.583898	0.462131	720.841	0.42157	0.0763814	0.356674	0.40442	0.0692934	0.136077	0.180102	0.22645	0.259388	0.8652	0.384815	0.325993	0.399615	0.373402	0.2481
67	0.226092	0.223066	0.224795	0.224579	0.224651	0.0518	0.0591	0.1076	0.0998	0.1975	0.3156	0.3473	0.3862	0.3638	0.3672	0.2604	0.1921	0.0767996	0.392286	0.146758	0.592184	-0.256136	0.1817	0.0548158	0.337428	27.4327	-0.569456	0.377241	0.837802	0.1037	0.2856	0.569456	0.434396	712.72	0.296277	0.070945	0.23017	0.274963	0.124339	0.132734	0.160883	0.150939	0.165652	0.8263	0.549313	0.316353	0.361999	0.344749	0.222449
68	0.306932	0.204765	0.160815	0.255849	0.224171	0.0414	0.0697	0.1284	0.1294	0.1661	0.329	0.3746	0.3746	0.3872	0.3907	0.2331	0.1538	0.0949694	0.427966	0.182293	0.53864	-0.299849	0.238378	0.0702428	0.390216	33.4194	-0.499032	0.40825	0.834806	0.1289	0.3225	0.499032	0.392784	723.456	0.399602	0.0812622	0.329024	0.385611	0.0435405	0.108321	0.154749	0.204963	0.248428	0.8562	0.335274	0.319577	0.397752	0.382926	0.292543
69	0.151016	0.135742	0.122917	0.143379	0.136558	0.0099	0.0279	0.078	0.0429	0.1164	0.5371	0.6357	0.6652	0.6538	0.596	0.2329	0.0986	0.0345964	0.659832	0.0890192	0.65035	-0.211864	0.119935	0.015345	0.35959	6.56164	-0.876848	0.655206	0.925201	0.06045	0.38735	0.876848	0.897353	723.544	0.697741	0.0979931	0.643764	0.690467	0.132805	0.212061	0.398189	0.405128	0.474681	0.9143	0.297564	0.490763	0.527251	0.525363	1.29206
70	0.190932	0.191941	0.237908	0.191436	0.206927	0.0312	0.0569	0.104	0.0983	0.1448	0.3789	0.4296	0.4136	0.4498	0.464	0.2197	0.125	0.0747882	0.472016	0.143104	0.57884	-0.266753	0.17967	0.0537814	0.425148	21.8542	-0.641306	0.460416	0.874027	0.10115	0.32605	0.641306	0.544843	722.814	0.51295	0.0855557	0.447012	0.495822	0.059337	0.152071	0.219888	0.274732	0.343689	0.8905	0.302151	0.353969	0.446948	0.408923	0.26562
71	0.181854	0.19122	0.215861	0.186537	0.196312	0.023	0.0415	0.0877	0.0732	0.1296	0.3645	0.4384	0.4684	0.4447	0.5004	0.211	0.1062	0.0551162	0.459138	0.114235	0.56694	-0.276373	0.15469	0.0346385	0.371175	16.4605	-0.71732	0.450684	0.893797	0.08045	0.3028	0.71732	0.590564	723.804	0.548668	0.0991102	0.47541	0.543662	0.0792205	0.186602	0.235015	0.330391	0.356413	0.9036	0.336124	0.348051	0.446122	0.387729	0.189791
72	0.26889	0.229839	0.221481	0.249364	0.24007	0.0222	0.0344	0.0735	0.0462	0.1175	0.4171	0.5067	0.57	0.5272	0.5402	0.2186	0.1032	0.0398658	0.5343	0.0868141	0.744589	-0.146402	0.0987122	0.0216229	0.331383	8.76328	-0.838856	0.52922	0.901061	0.05985	0.32345	0.838856	0.777613	723.569	0.635489	0.116594	0.560419	0.623518	0.118106	0.241012	0.31052	0.358608	0.413784	0.9194	0.339341	0.403563	0.485041	0.431646	0.100276
73	0.237188	0.156348	0.150151	0.196768	0.181229	0.0219	0.0381	0.081	0.0471	0.1175	0.4072	0.4934	0.5468	0.5171	0.4861	0.2005	0.0906	0.0423617	0.525521	0.0936985	0.808917	-0.105634	0.100134	0.0221544	0.300684	9.10849	-0.833038	0.519241	0.880385	0.06405	0.3226	0.833038	0.776115	723.454	0.629688	0.118901	0.552125	0.615322	0.124116	0.239704	0.303055	0.377533	0.441193	0.9385	0.307515	0.392169	0.503836	0.424609	0.10417
74	0.359385	0.351315	0.328547	0.35535	0.346416	0.0269	0.0297	0.0711	0.0475	0.1214	0.3727	0.4379	0.4436	0.4555	0.4879	0.1927	0.0948	0.03756	0.463456	0.0855071	0.625263	-0.23057	0.113712	0.0198418	0.304307	10.4281	-0.811133	0.45797	0.90673	0.0593	0.28705	0.811133	0.672047	721.894	0.57913	0.0999759	0.508601	0.565886	0.116953	0.236083	0.26129	0.340522	0.40543	0.9171	0.333483	0.349724	0.481292	0.378177	0.0975578
75	0.198281	0.21125	0.21125	0.204765	0.206927	0.0218	0.0352	0.0765	0.0466	0.1171	0.435	0.5443	0.6304	0.546	0.5317	0.2195	0.0963	0.0405009	0.553299	0.0895757	0.755365	-0.139364	0.101276	0.0214421	0.332596	8.5348	-0.842727	0.547985	0.899216	0.06155	0.33455	0.842727	0.799501	724.636	0.64681	0.11315	0.575801	0.645903	0.119816	0.237867	0.322881	0.39012	0.426519	0.9275	0.327918	0.416111	0.490601	0.446178	0.10738
76	0.353909	0.345407	0.377397	0.349658	0.358904	0.0375	0.0964	0.1416	0.1642	0.1899	0.3023	0.3341	0.3378	0.352	0.4069	0.2483	0.1788	0.125813	0.41342	0.216823	0.587089	-0.260169	0.24119	0.111786	0.408181	46.6477	-0.363812	0.388414	0.786067	0.1529	0.3289	0.363812	0.290856	723.45	0.299133	0.075959	0.228362	0.275191	0.0215034	0.0723352	0.105319	0.162725	0.172747	0.8498	0.356094	0.304596	0.362598	0.380258	0.328175
77	0.20246	0.19439	0.185168	0.198425	0.194006	0.0249	0.0364	0.0803	0.0473	0.1248	0.4714	0.5826	0.5848	0.5854	0.5579	0.2175	0.0909	0.0414936	0.592772	0.0931954	0.769556	-0.130227	0.104346	0.0214411	0.344825	8.07995	-0.850482	0.587308	0.899465	0.0638	0.3565	0.850482	0.842783	724.202	0.64855	0.107873	0.581349	0.647159	0.133805	0.228093	0.348888	0.410506	0.458214	0.9346	0.29974	0.441588	0.513314	0.476536	0.132256
78	0.328836	0.270763	0.207503	0.299799	0.269034	0.0394	0.0481	0.0959	0.0888	0.1451	0.3256	0.3742	0.396	0.3841	0.4015	0.2261	0.1399	0.065355	0.405728	0.130699	0.541667	-0.297297	0.177046	0.0445389	0.355663	23.119	-0.624445	0.394231	0.872778	0.09235	0.2844	0.624445	0.474408	721.753	0.451625	0.0824292	0.383471	0.441171	0.0726537	0.151727	0.182683	0.235519	0.258931	0.8675	0.413769	0.315162	0.397147	0.352548	0.206232
79	0.197272	0.164706	0.174937	0.180989	0.178971	0.0281	0.0379	0.0795	0.0571	0.1282	0.369	0.4207	0.4752	0.4354	0.4891	0.205	0.1088	0.0465198	0.446267	0.0978808	0.663748	-0.202105	0.119774	0.0272213	0.312721	13.1144	-0.768122	0.439128	0.885332	0.0683	0.286	0.768122	0.633138	721.09	0.545067	0.082546	0.484312	0.532884	0.108786	0.213046	0.24066	0.306565	0.359775	0.9099	0.362043	0.340293	0.45275	0.369563	0.131814
80	0.139776	0.13358	0.143955	0.136678	0.139104	0.0279	0.0458	0.091	0.0661	0.1337	0.426	0.5065	0.528	0.5145	0.5063	0.2102	0.1008	0.0550216	0.52665	0.112473	0.69289	-0.181412	0.131334	0.0332679	0.373719	12.8474	-0.772305	0.518729	0.884112	0.07855	0.3358	0.772305	0.715106	723.272	0.587473	0.0940989	0.522244	0.582318	0.10436	0.202218	0.287255	0.351768	0.419898	0.9247	0.295593	0.392998	0.490733	0.435754	0.204263
81	0.192949	0.21197	0.243672	0.20246	0.216197	0.0206	0.0331	0.075	0.0452	0.1176	0.458	0.5594	0.5736	0.5696	0.5731	0.2156	0.0899	0.0386797	0.576292	0.0875673	0.732301	-0.154534	0.102417	0.0199483	0.343279	7.93539	-0.85296	0.571391	0.907807	0.0601	0.3449	0.85296	0.823208	723.991	0.657742	0.108603	0.591383	0.652585	0.123221	0.236583	0.339804	0.411457	0.450841	0.9311	0.308421	0.430655	0.507256	0.463106	0.101712
82	0.209953	0.212979	0.203613	0.211466	0.208848	0.0287	0.0558	0.1028	0.1003	0.152	0.3434	0.3883	0.4008	0.4034	0.4593	0.2332	0.1447	0.0748114	0.428205	0.143624	0.556331	-0.285074	0.184782	0.054443	0.39359	24.8637	-0.601747	0.415682	0.866985	0.10155	0.30325	0.601747	0.477563	721.878	0.452647	0.0803428	0.386354	0.43735	0.0636564	0.142117	0.187173	0.234189	0.267358	0.8666	0.384751	0.32948	0.403046	0.375121	0.242058
83	0.115423	0.10231	0.0890531	0.108867	0.102262	0.0247	0.0504	0.0949	0.0893	0.1368	0.3481	0.3971	0.41	0.4166	0.467	0.2125	0.1233	0.0670874	0.436504	0.130309	0.56439	-0.278454	0.168146	0.0474259	0.392017	21.4354	-0.646966	0.426063	0.878727	0.0921	0.3004	0.646966	0.519722	722.624	0.505602	0.0895776	0.43576	0.487544	0.0606767	0.158538	0.204193	0.265634	0.324432	0.8882	0.332031	0.33069	0.435141	0.377536	0.22217
84	0.206639	0.236179	0.273357	0.221409	0.238725	0.0289	0.0341	0.0749	0.0469	0.1325	0.405	0.4796	0.5596	0.4843	0.496	0.2134	0.1129	0.0399911	0.492297	0.0883721	0.727079	-0.158025	0.103015	0.0213523	0.303253	9.68408	-0.823419	0.486566	0.893218	0.0609	0.30305	0.823419	0.724196	721.794	0.570363	0.0891713	0.506977	0.567064	0.139714	0.24023	0.281122	0.307999	0.388276	0.9084	0.359119	0.374223	0.473476	0.3996	0.0979815
85	0.115712	0.0929438	0.083145	0.104328	0.0972668	0.0193	0.0369	0.0828	0.0494	0.1242	0.4757	0.5715	0.6032	0.5892	0.5744	0.2157	0.0903	0.042695	0.597037	0.0964168	0.746964	-0.144844	0.110849	0.0220152	0.351528	8.38425	-0.845287	0.591267	0.900002	0.0661	0.3607	0.845287	0.838798	723.546	0.651808	0.106583	0.585931	0.64295	0.129119	0.222664	0.349893	0.409804	0.464033	0.9341	0.291185	0.443668	0.518097	0.480867	0.159881
86	0.161103	0.156492	0.175801	0.158798	0.164465	0.0194	0.0328	0.0736	0.0435	0.1162	0.4626	0.5653	0.6048	0.589	0.5692	0.2155	0.0922	0.037773	0.595172	0.0854939	0.754023	-0.140236	0.0976098	0.0193859	0.348118	7.3854	-0.862451	0.590604	0.909827	0.05855	0.35305	0.862451	0.850218	724.016	0.670448	0.120198	0.59848	0.658988	0.124913	0.235407	0.354121	0.400715	0.464264	0.9299	0.30013	0.443487	0.519349	0.476643	0.0863794
87	0.369616	0.285317	0.249436	0.327467	0.301457	0.0246	0.0383	0.0796	0.0594	0.1106	0.3438	0.4255	0.4256	0.4436	0.4666	0.1999	0.0966	0.0476972	0.454583	0.0993203	0.644781	-0.215967	0.123453	0.0285807	0.331028	13.3904	-0.763817	0.447559	0.890279	0.0695	0.2913	0.763817	0.634936	724.789	0.600866	0.126746	0.513204	0.58739	0.0785454	0.210142	0.244479	0.348398	0.37871	0.9206	0.337066	0.34405	0.459803	0.377368	0.142267
88	0.221481	0.200154	0.182574	0.210818	0.201403	0.0213	0.0356	0.0765	0.0477	0.1161	0.4463	0.5436	0.6048	0.5608	0.5131	0.2153	0.0936	0.0412083	0.568	0.0901529	0.746331	-0.145258	0.102501	0.0221976	0.349675	8.50571	-0.843221	0.562825	0.902883	0.0621	0.3425	0.843221	0.811867	724.032	0.656966	0.113693	0.587127	0.648022	0.114917	0.232904	0.332031	0.393979	0.445175	0.9299	0.308947	0.424765	0.504887	0.458159	0.121741
89	0.255056	0.210529	0.216726	0.232793	0.227437	0.0271	0.033	0.0765	0.0502	0.1159	0.411	0.5105	0.5616	0.5117	0.518	0.218	0.1011	0.0407014	0.519816	0.0915002	0.657371	-0.206731	0.116373	0.0216549	0.335782	9.81044	-0.821321	0.514157	0.906108	0.06335	0.3192	0.821321	0.737032	724.504	0.630656	0.109136	0.560068	0.629949	0.107223	0.233124	0.297128	0.366343	0.402494	0.9147	0.34223	0.393294	0.475205	0.422655	0.121188
90	0.104616	0.0799316	0.0966472	0.0922737	0.0937315	0.027	0.0368	0.085	0.0541	0.1334	0.4357	0.5068	0.5684	0.5292	0.4819	0.2158	0.1048	0.0446193	0.538706	0.100756	0.680222	-0.190319	0.124959	0.0234221	0.33682	10.223	-0.814504	0.531958	0.896107	0.06955	0.33415	0.814504	0.752789	722.025	0.597344	0.0969012	0.53119	0.583255	0.130863	0.223869	0.306025	0.346226	0.420671	0.9147	0.318848	0.404118	0.492116	0.438616	0.151196
91	0.191364	0.181854	0.200875	0.186609	0.191364	0.0296	0.0336	0.0749	0.0486	0.1229	0.3807	0.4524	0.5732	0.4739	0.479	0.2162	0.1086	0.0404099	0.482238	0.0892859	0.691358	-0.182482	0.108337	0.0218019	0.307497	10.2553	-0.813971	0.476386	0.896096	0.06175	0.2987	0.813971	0.702511	722.324	0.588137	0.109057	0.511914	0.572745	0.120334	0.23574	0.272863	0.331281	0.373424	0.91	0.37102	0.368323	0.45862	0.392888	0.104814
92	0.366878	0.388493	0.404488	0.377685	0.38662	0.0199	0.0355	0.0766	0.0542	0.1203	0.4325	0.5306	0.508	0.5358	0.538	0.2162	0.099	0.0438646	0.543955	0.093836	0.654982	-0.208473	0.11695	0.0251188	0.379117	10.1157	-0.816271	0.538534	0.910361	0.0654	0.3333	0.816271	0.754977	724.294	0.633288	0.106682	0.564761	0.630358	0.102498	0.223018	0.310394	0.371827	0.425	0.9178	0.315218	0.408549	0.491892	0.44369	0.155602
93	0.400597	0.497577	0.623808	0.449087	0.507327	0.0319	0.0505	0.0891	0.0885	0.117	0.3377	0.4116	0.3884	0.4159	0.4302	0.2049	0.1112	0.0668524	0.434447	0.125583	0.570621	-0.273381	0.156146	0.0501599	0.413099	21.2792	-0.649088	0.425212	0.884386	0.0888	0.29675	0.649088	0.521953	726.1	0.560893	0.103769	0.485375	0.557321	0.0345148	0.159463	0.204313	0.296425	0.339884	0.9013	0.312652	0.327839	0.440164	0.376453	0.219756
94	0.139632	0.146981	0.127528	0.143307	0.138047	0.0236	0.0314	0.0712	0.0431	0.1141	0.4065	0.4901	0.4936	0.5028	0.5101	0.2002	0.0905	0.0367878	0.509642	0.0832289	0.728538	-0.157047	0.0977299	0.0190076	0.304363	8.572	-0.842096	0.504644	0.901645	0.05715	0.30855	0.842096	0.753162	723.254	0.630086	0.105906	0.56166	0.62231	0.120061	0.249488	0.296386	0.377365	0.430441	0.9292	0.323491	0.38268	0.4954	0.411005	0.0785045
95	0.841111	0.789235	0.551038	0.815173	0.727128	0.046	0.0846	0.1212	0.1442	0.1714	0.2708	0.3022	0.3088	0.3114	0.3438	0.2551	0.1828	0.110451	0.363941	0.18837	0.586685	-0.26049	0.206584	0.100654	0.370494	46.307	-0.366989	0.343167	0.792596	0.1327	0.2884	0.366989	0.271059	723.239	0.289975	0.0697355	0.224785	0.276182	0.0226267	0.0750164	0.0927754	0.165106	0.0993822	0.8422	0.573806	0.284645	0.319098	0.335667	0.278117
96	0.182574	0.311544	0.326818	0.247059	0.273645	0.0282	0.0317	0.0821	0.0526	0.1308	0.4248	0.4929	0.5288	0.5083	0.4448	0.2184	0.1087	0.0408341	0.517567	0.0975047	0.602662	-0.247924	0.136229	0.0203096	0.325659	10.3482	-0.812444	0.511014	0.906966	0.06735	0.3215	0.812444	0.718249	721.899	0.590674	0.0894867	0.529158	0.580568	0.128219	0.228148	0.293064	0.335371	0.398927	0.9021	0.341363	0.391195	0.477137	0.421733	0.133331
97	1.05524	0.47063	0.279121	0.762937	0.601665	0.0317	0.0443	0.085	0.0791	0.1383	0.3192	0.3754	0.3926	0.3791	0.4162	0.225	0.137	0.0591957	0.396483	0.116111	0.560051	-0.28201	0.151772	0.0412251	0.352786	20.8652	-0.654736	0.387264	0.881405	0.08205	0.2716	0.654736	0.492951	722.21	0.465404	0.0857798	0.39541	0.461553	0.0756622	0.163388	0.18649	0.243094	0.25509	0.8725	0.439255	0.311722	0.392794	0.34206	0.180761
98	0.353909	0.357944	0.338058	0.355926	0.34997	0.0584	0.0464	0.0885	0.0886	0.1437	0.3038	0.3411	0.3486	0.3599	0.3226	0.2392	0.1579	0.0641174	0.381065	0.125229	0.523702	-0.312593	0.168989	0.0464524	0.360307	24.6179	-0.604905	0.370645	0.878536	0.08855	0.2685	0.604905	0.439423	720.554	0.429309	0.0845261	0.357765	0.407178	0.066049	0.144947	0.16654	0.204734	0.201469	0.8463	0.500309	0.305569	0.368032	0.33406	0.196675
99	0.184447	0.190644	0.191076	0.187545	0.188722	0.0357	0.0367	0.0808	0.0589	0.1377	0.3568	0.4148	0.4772	0.4356	0.3983	0.2285	0.1316	0.0464933	0.446929	0.0999892	0.62309	-0.232218	0.129676	0.0267528	0.317535	13.5216	-0.76178	0.439564	0.890389	0.06985	0.28765	0.76178	0.62213	720.839	0.519623	0.0994447	0.443074	0.501538	0.118508	0.20969	0.239463	0.269092	0.311851	0.8829	0.419073	0.347822	0.425663	0.370957	0.138282
100	0.260244	0.263414	0.265431	0.261829	0.26303	0.0349	0.0499	0.0902	0.0993	0.1521	0.2982	0.3442	0.3694	0.3655	0.3901	0.2442	0.1622	0.0703923	0.389341	0.134151	0.502518	-0.331099	0.179496	0.0549343	0.402374	27.1683	-0.572719	0.378749	0.882801	0.09475	0.2775	0.572719	0.419331	721.685	0.412287	0.101401	0.32445	0.387064	0.0573864	0.1338	0.162397	0.201772	0.19895	0.8383	0.484364	0.310825	0.367276	0.345693	0.222099
101	0.538213	0.72756	0.758398	0.632887	0.674724	0.0319	0.0431	0.0889	0.0751	0.1354	0.3922	0.4434	0.4584	0.4695	0.3972	0.216	0.1208	0.056893	0.483708	0.116375	0.573901	-0.270728	0.154905	0.0364096	0.396619	15.9957	-0.724201	0.475468	0.896641	0.082	0.31675	0.724201	0.617466	721.88	0.552323	0.0897064	0.486732	0.532135	0.0835946	0.186345	0.250306	0.28266	0.369803	0.8903	0.323946	0.365436	0.464219	0.407845	0.209296
102	0.209088	0.191652	0.232	0.20037	0.210914	0.0364	0.0413	0.0874	0.0799	0.1348	0.3581	0.4164	0.408	0.4299	0.3875	0.2126	0.1212	0.0574445	0.445911	0.118418	0.516896	-0.318482	0.169086	0.0377559	0.393009	18.5857	-0.686544	0.437262	0.899896	0.08365	0.2986	0.686544	0.547029	722.766	0.522578	0.0911168	0.453033	0.510885	0.0714925	0.17405	0.220097	0.273817	0.33821	0.8815	0.339919	0.339126	0.443237	0.381132	0.203141
103	0.193526	0.268602	0.404632	0.231064	0.28892	0.0381	0.0504	0.0869	0.091	0.1366	0.3101	0.3646	0.3658	0.3716	0.346	0.2295	0.1468	0.067723	0.392325	0.125828	0.553846	-0.287129	0.156903	0.0527779	0.389132	24.4887	-0.606572	0.38258	0.877875	0.08895	0.27475	0.606572	0.455638	723.398	0.462416	0.0902156	0.388404	0.454908	0.0521051	0.145482	0.172641	0.219771	0.2364	0.863	0.439127	0.308834	0.386282	0.344588	0.206379
104	0.492101	0.622944	0.802348	0.557522	0.639131	0.0298	0.0377	0.0819	0.0635	0.1277	0.3627	0.4146	0.4536	0.4314	0.4035	0.2142	0.1159	0.048928	0.443673	0.103633	0.593701	-0.254941	0.137948	0.0292302	0.33448	14.7195	-0.743383	0.436048	0.892978	0.0727	0.2884	0.743383	0.601281	721.584	0.543194	0.086513	0.479201	0.529043	0.0940997	0.200587	0.233234	0.297789	0.336431	0.896	0.376872	0.340579	0.437426	0.370948	0.152879
105	0.248284	0.301889	0.251886	0.275086	0.267353	0.0654	0.0739	0.1222	0.1334	0.1786	0.3095	0.3389	0.367	0.3567	0.3209	0.2681	0.1956	0.0992888	0.399954	0.18091	0.553973	-0.287024	0.220588	0.0806732	0.389393	37.3984	-0.455621	0.380829	0.825215	0.1278	0.30615	0.455621	0.348286	720.388	0.332711	0.0708496	0.268183	0.309758	0.0482411	0.0973637	0.131258	0.156351	0.141805	0.8188	0.525279	0.315525	0.346416	0.36256	0.282627
106	0.241655	0.242808	0.175513	0.242231	0.219992	0.0579	0.047	0.0975	0.0898	0.16	0.3521	0.3934	0.4328	0.413	0.3834	0.2469	0.1596	0.0649661	0.43375	0.132553	0.523385	-0.312865	0.186287	0.0432882	0.380384	21.7433	-0.6428	0.42265	0.883208	0.09365	0.30015	0.6428	0.505221	719.867	0.441536	0.0795974	0.375122	0.421756	0.0904171	0.15717	0.2014	0.21476	0.251705	0.8446	0.43722	0.340242	0.397437	0.375152	0.221645
107	0.307653	0.298286	0.356791	0.30297	0.32091	0.0385	0.0463	0.094	0.0874	0.1493	0.3385	0.379	0.4082	0.3939	0.3931	0.2408	0.1539	0.063613	0.414285	0.128354	0.529748	-0.307405	0.177443	0.0430491	0.366243	22.1884	-0.636817	0.40348	0.880647	0.0907	0.28765	0.636817	0.487731	720.521	0.450295	0.0756417	0.387864	0.434791	0.0792993	0.156057	0.190316	0.220167	0.241216	0.8513	0.450553	0.326452	0.389297	0.359012	0.206905
108	0.146981	0.112253	0.132427	0.129617	0.130554	0.0302	0.0249	0.0705	0.0443	0.1167	0.4369	0.5204	0.5556	0.5334	0.444	0.2185	0.1059	0.0332125	0.53986	0.0832631	0.562077	-0.280347	0.125428	0.0156464	0.335172	8.30521	-0.846633	0.535236	0.928275	0.0574	0.3241	0.846633	0.758318	723.107	0.640978	0.0994538	0.578396	0.633652	0.119226	0.244774	0.316099	0.347102	0.418806	0.8996	0.338086	0.407589	0.490557	0.435036	0.0878165
109	0.377829	0.305059	0.311111	0.341444	0.331333	0.0282	0.0454	0.0893	0.0778	0.1387	0.3708	0.4265	0.4544	0.4486	0.4605	0.2325	0.1352	0.0594316	0.463971	0.118437	0.583548	-0.262987	0.15303	0.0395534	0.39083	17.3428	-0.704407	0.455296	0.889861	0.08355	0.30785	0.704407	0.588609	722.108	0.527669	0.0949475	0.455545	0.5092	0.0823123	0.180004	0.234239	0.264618	0.317281	0.8778	0.378909	0.35728	0.430356	0.393862	0.206285
110	0.635336	0.515013	0.422212	0.575174	0.524187	0.0308	0.0366	0.0857	0.0612	0.1465	0.4125	0.476	0.5104	0.4852	0.435	0.2362	0.1279	0.0473278	0.496497	0.105309	0.598039	-0.251534	0.143302	0.0261368	0.346491	12.6134	-0.775988	0.489044	0.899401	0.07345	0.31605	0.775988	0.671779	721.066	0.536172	0.0809847	0.47585	0.529317	0.129819	0.21103	0.271154	0.297446	0.345162	0.8841	0.384271	0.381582	0.443777	0.410154	0.164654
111	0.371633	0.317452	0.310535	0.344542	0.333207	0.0425	0.0357	0.0816	0.0614	0.1501	0.3325	0.3802	0.4728	0.402	0.3539	0.2342	0.1465	0.0468186	0.414768	0.10212	0.581433	-0.264676	0.140343	0.0268625	0.302485	15.2736	-0.735002	0.406662	0.888185	0.0715	0.2725	0.735002	0.566666	718.566	0.456258	0.0946222	0.377953	0.433905	0.129575	0.197526	0.214995	0.230365	0.263754	0.8635	0.471836	0.328978	0.401559	0.347205	0.138332
112	0.191796	0.246122	0.29843	0.218959	0.24545	0.0363	0.0761	0.1178	0.1152	0.1752	0.2816	0.3095	0.3382	0.3254	0.3572	0.2481	0.1794	0.0936308	0.364737	0.164766	0.66059	-0.204391	0.178325	0.0744204	0.318218	35.4026	-0.477077	0.34519	0.783592	0.1165	0.2792	0.477077	0.363454	717.22	0.30004	0.0721582	0.232925	0.277079	0.0736896	0.104431	0.123644	0.160702	0.134786	0.8576	0.559423	0.289343	0.340948	0.326263	0.236697
113	0.504205	0.437919	0.419474	0.471062	0.453866	0.0336	0.0392	0.081	0.0676	0.1357	0.3169	0.3822	0.4308	0.3879	0.3696	0.2236	0.1342	0.0514774	0.401992	0.105502	0.579882	-0.265918	0.139684	0.0327151	0.323729	17.4272	-0.703183	0.393746	0.885426	0.0743	0.26825	0.703183	0.534011	722.23	0.481665	0.100738	0.400354	0.475961	0.0941182	0.183196	0.200918	0.24986	0.268684	0.8766	0.447077	0.316594	0.400295	0.340794	0.153003
114	0.0981314	0.133148	0.212403	0.11564	0.147894	0.0325	0.0324	0.0773	0.0554	0.1311	0.3394	0.3845	0.4508	0.4021	0.3798	0.2134	0.1239	0.042367	0.413193	0.0951023	0.584838	-0.261959	0.132173	0.0232207	0.28818	13.7777	-0.757814	0.405898	0.893234	0.06635	0.2674	0.757814	0.581126	719.929	0.508252	0.0845583	0.442721	0.491466	0.115094	0.208435	0.219499	0.265342	0.30658	0.8855	0.423935	0.321888	0.422775	0.343139	0.119509
115	0.471495	0.431723	0.419907	0.451609	0.441041	0.0305	0.0439	0.0941	0.0798	0.149	0.3539	0.4156	0.426	0.4183	0.4145	0.2261	0.1341	0.059188	0.436117	0.123381	0.550125	-0.290218	0.171052	0.0372287	0.354733	19.0772	-0.679582	0.425844	0.883033	0.08695	0.2961	0.679582	0.539752	721.859	0.474705	0.0833981	0.407437	0.472193	0.0951902	0.172032	0.212362	0.255414	0.298262	0.8739	0.38996	0.336226	0.419139	0.372267	0.197547
116	0.488787	0.593259	0.698452	0.541023	0.593499	0.0276	0.0691	0.1058	0.1092	0.1472	0.2948	0.3341	0.367	0.3556	0.3923	0.2296	0.1494	0.0868661	0.386742	0.152047	0.632784	-0.224902	0.167198	0.0713206	0.367028	30.7087	-0.53012	0.371989	0.826511	0.1075	0.2853	0.53012	0.412716	722.654	0.414479	0.0934809	0.333937	0.388323	0.0437588	0.120067	0.148412	0.211609	0.215311	0.8796	0.422318	0.299305	0.374898	0.34502	0.237999
117	0.428697	0.313417	0.503485	0.371057	0.415199	0.0407	0.0542	0.0938	0.0963	0.1347	0.3344	0.3913	0.3886	0.3994	0.3608	0.2237	0.135	0.0722458	0.421417	0.134433	0.562825	-0.279734	0.166659	0.0556446	0.410045	24.1112	-0.611459	0.410846	0.875501	0.09505	0.29475	0.611459	0.482428	724.121	0.4956	0.08858	0.425709	0.487833	0.0446449	0.146055	0.187438	0.247282	0.281977	0.8771	0.36878	0.323699	0.40984	0.369326	0.23075
